# Supplementary material
Source: PubMed Central journal article supplement (PMC3975687)
Supplement: NIHMS546183-supplement-2_si_001.pdf [file NIHMS546183-supplement-2_si_001.pdf]

## **Supporting Information**

A highly sensitive targeted mass spectrometric assay for quantification of AGR2 protein in human urine and serum

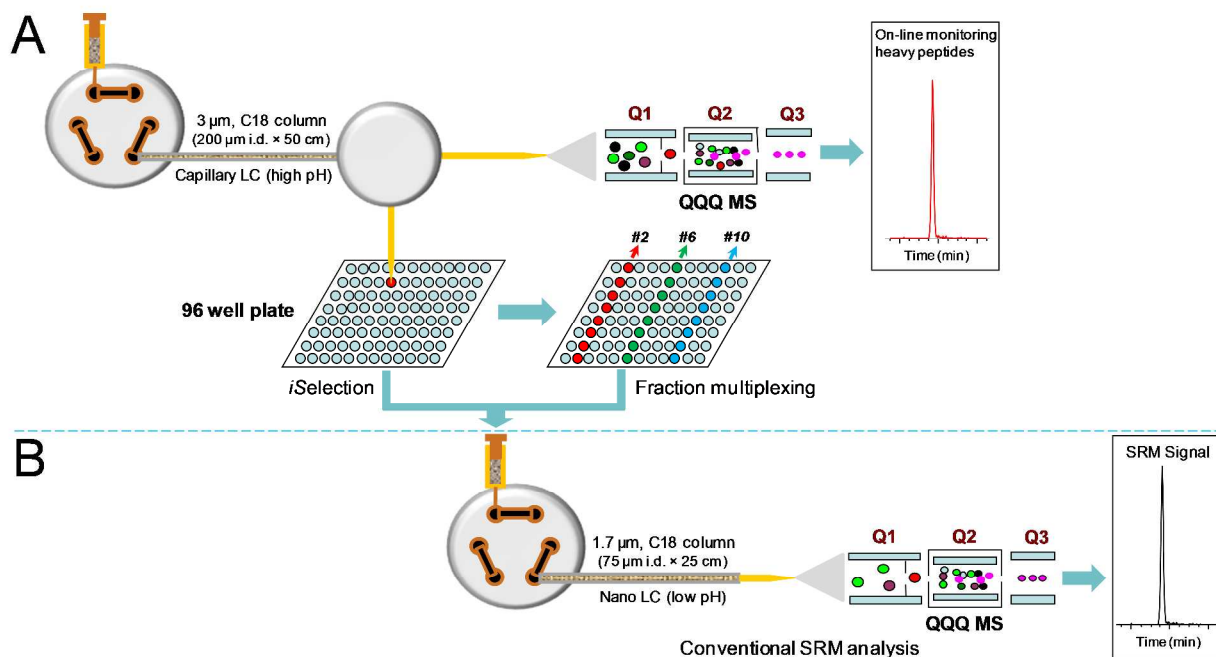

**Figure S1.** Schematic diagram of the PRISM-SRM workflow. **(A)** PRISM workflow.  $\sim 20 \mu\text{g}$  peptide sample spiked with internal standard (IS) heavy peptides was injected and separated by a high resolution reversed-phase cLC system using high pH mobile phases. The eluent from the cLC column at a flow rate of  $3.3 \mu\text{L}/\text{min}$  was split into two flowing streams via a Tee union (the split ratio of flow rates is 1:10): a small fraction (9%) of the column eluent went to a triple quadrupole mass spectrometer for on-line SRM monitoring of IS peptides; a large fraction (91%) of the column eluent was automatically collected every minute into a 96-well plate during a  $\sim 100$ -min LC run. The specific target peptide fractions were either selected based on the same elution times of IS being monitored by the on-line SRM (*i*Selection) or multiplexed. For example, 96 fractions collected along with the first dimensional LC separation can be multiplexed into 12 fractions by combining 8 fractions from the first dimensional LC separation into one fraction for downstream LC-SRM analyses, such as pooling fractions 2, 14, 26, 38, 50, 62, 74, and 86 (marked in red color) into one sample (#2) for the second dimensional LC-SRM. **(B)** Conventional LC-SRM workflow. Following *i*Selection, a target peptide fraction was either directly subjected to nanoLC-SRM with  $4 \mu\text{L}$  sample per injection ( $\sim 45 \text{ ng}$  peptides on nanoLC column) or multiplexed with other target fractions with a final volume of  $20 \mu\text{L}$  prior to nanoLC-SRM analysis.

#29A

Crude heavy (10 fmol/ $\mu$ L)

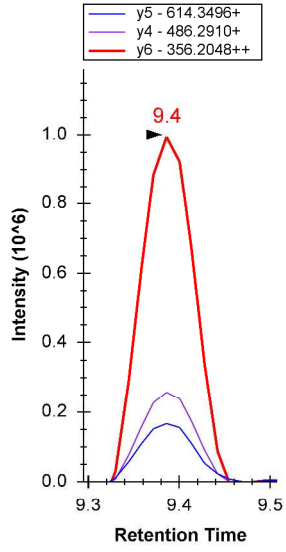

#27A

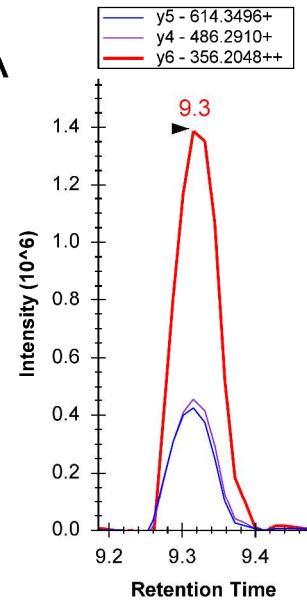

Light

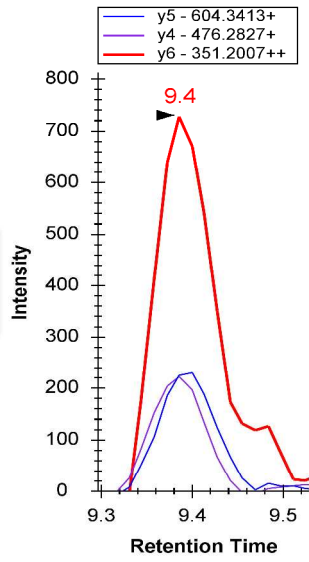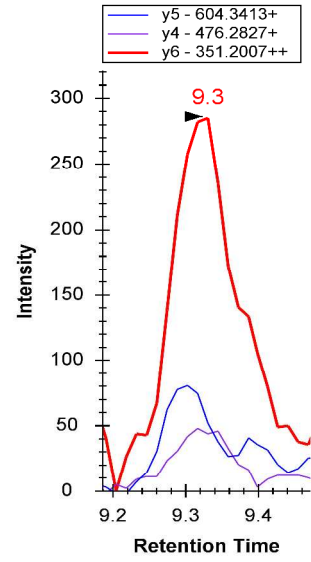

#19A

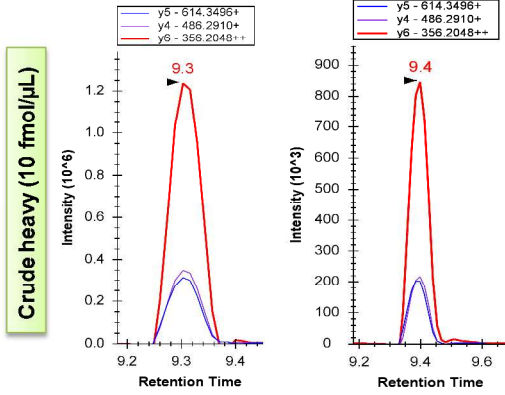

#16A

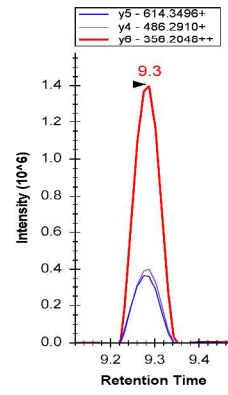

#12A

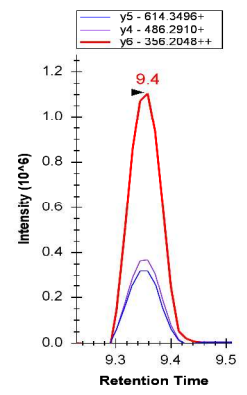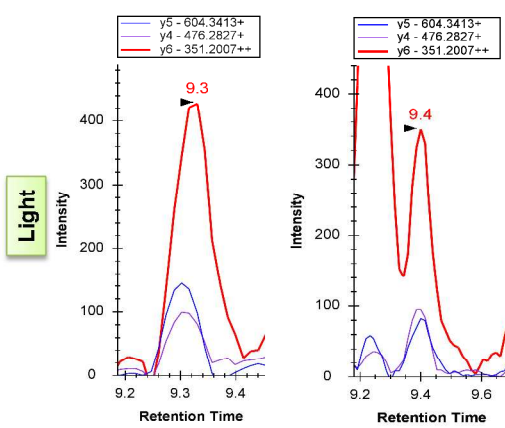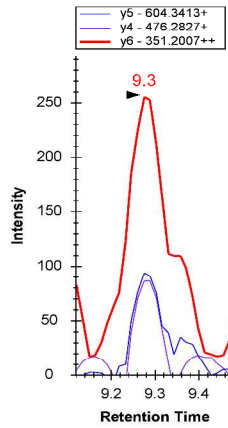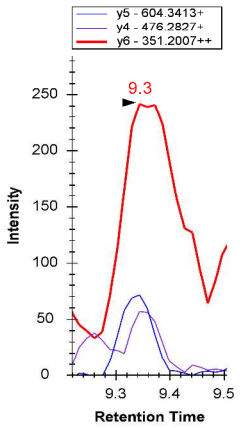

**Figure S2.** Extracted ion chromatograms of transitions monitored for LPQTL SR derived from AGR2 protein in 5 prostate cancer patient sera.

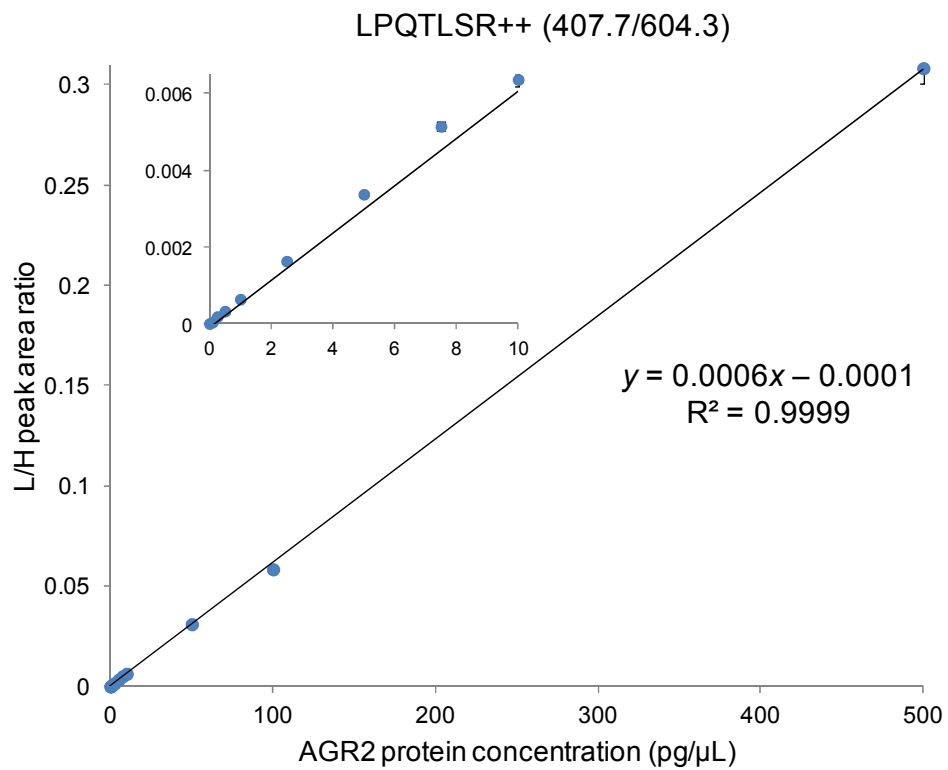

**Figure S3.** Calibration curve for quantifying AGR2 protein using the transition of 407.7/604.3 from LPQTLR. Inset plots show details of the low concentration range.

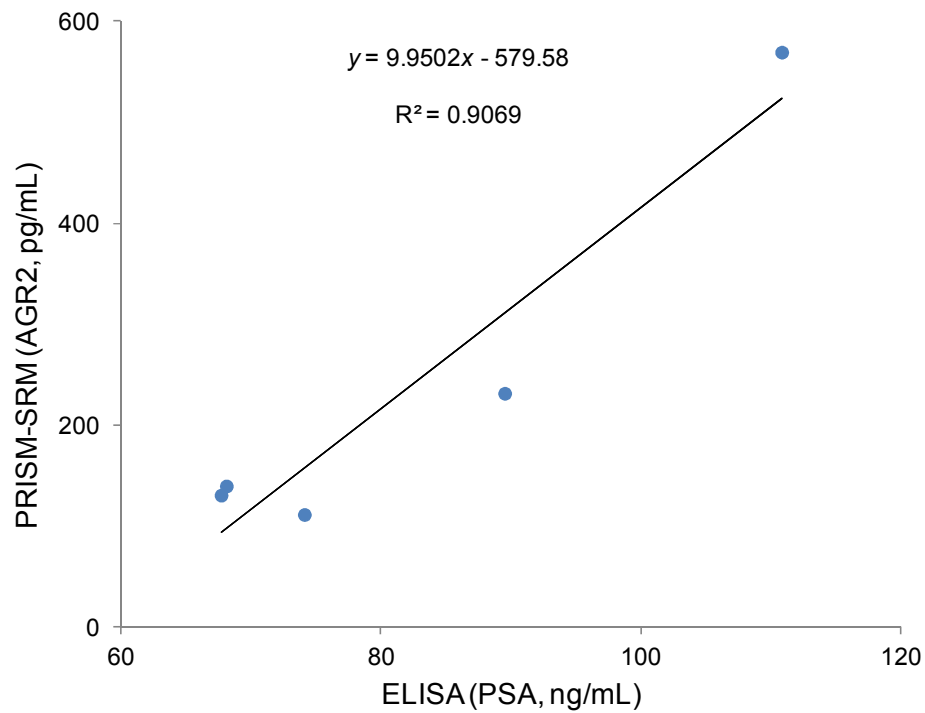

**Figure S4.** Correlation plot between the AGR2 protein concentrations based on the PRISM-SRM measurements and the PSA protein concentrations determined by ELISA measurements.

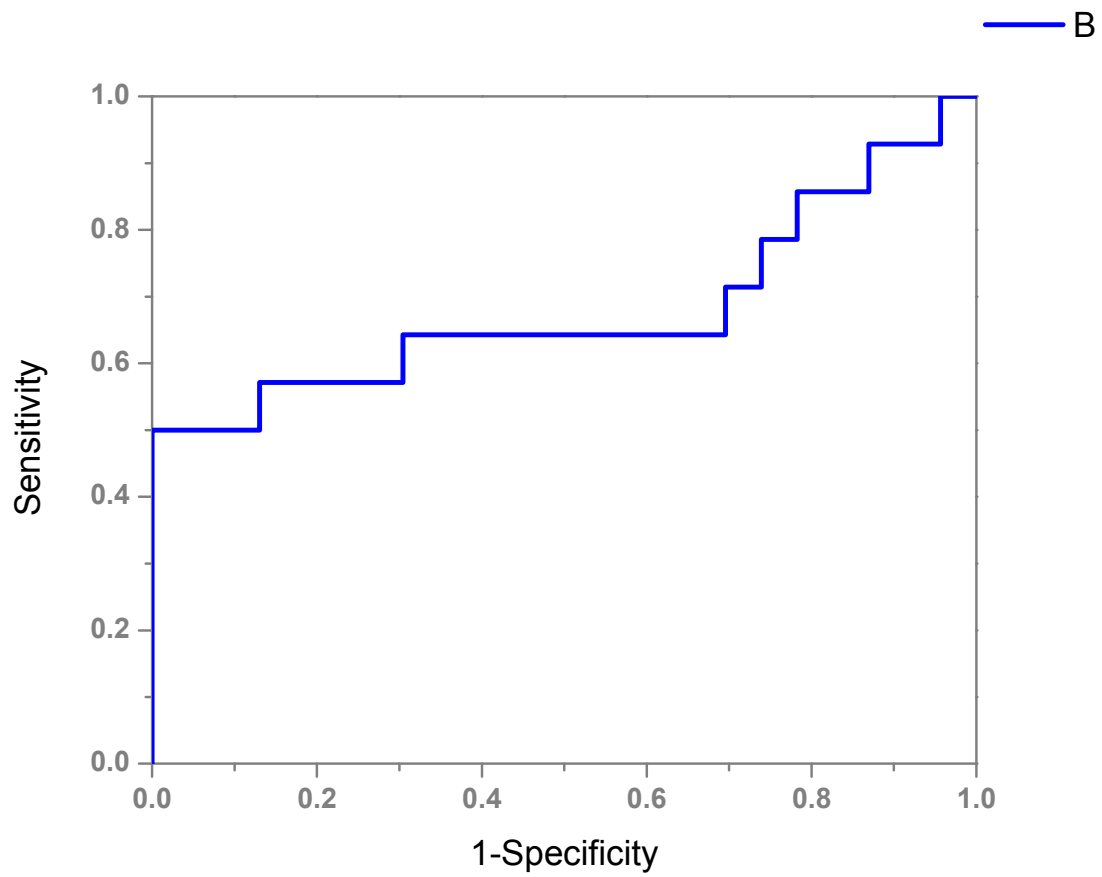

**Figure S5.** Preliminary ROC curve based on AGR2/PSA ratio values from an initial sets of 37 patients.

**Table S1.** LC-SRM measurements by spiking tryptic digest of recombinant AGR2 protein into diluted prostate patient urine (20 ng/ $\mu$ L) with the crude heavy peptides included at 100 fmol/ $\mu$ L for generating calibration curves. The transition used is 407.7/351.2 from LPQTLRSR.

| AGR2 concentration (pg/ $\mu$ L) | 0   | 0.1     | 0.25    | 0.5     | 1       | 2.5     | 5       | 7.5     | 10      | 50      | 100     | 500     |
|----------------------------------|-----|---------|---------|---------|---------|---------|---------|---------|---------|---------|---------|---------|
| L/H                              | n/a | 6.32E-5 | 1.68E-4 | 3.24E-4 | 6.23E-4 | 1.45E-3 | 3.09E-3 | 4.59E-3 | 5.81E-3 | 2.82E-2 | 5.31E-2 | 2.94E-1 |
| Standard derivation              | n/a | 3.88E-6 | 3.27E-5 | 3.52E-5 | 4.53E-5 | 4.04E-5 | 3.06E-5 | 5.70E-5 | 4.63E-5 | 2.10E-4 | 9.60E-4 | 7.79E-3 |
| CV (%)                           | n/a | 6.1     | 19.5    | 10.9    | 7.3     | 2.8     | 1.0     | 1.2     | 0.8     | 0.7     | 1.8     | 2.7     |

**Table S2.** Summary of all measurements with their corresponding targeted methods.

| Regular LC-SRM                                                                  | PRISM-SRM      | IgY14-PRISM-SRM | ELISA                                    |
|---------------------------------------------------------------------------------|----------------|-----------------|------------------------------------------|
| AGR2 calibration curves using diluted urine<br>Endogenous AGR2 in patient urine | Prostate urine | Prostate serum  | AGR2 in urine (UW)<br>PSA in serum (JHU) |

**Table S3.** Evaluation of reproducibility of the entire PRISM-SRM (including trypsin digestion and SPE cleanup) starting with five sample aliquots from the same prostate urine specimens.



| Sample Name | Repro | 407.7>-351.2, 412.7468>-356.2048 |          |          |           |        | 407.7427>-476.2827, 412.7468>-486.2910 |         |          |           |        |
|-------------|-------|----------------------------------|----------|----------|-----------|--------|----------------------------------------|---------|----------|-----------|--------|
|             |       | Light                            | Heavy    | L/H      | AVERAGE   | CV (%) | Light                                  | Heavy   | L/H      | AVERAGE   | CV (%) |
| 1           | A     | 15392                            | 24930706 | 0.000617 | 0.0006236 | 0.9    | 4013                                   | 6793537 | 0.000591 | 0.0006346 | 7.1    |
|             | B     | 15977                            | 25538794 | 0.000626 |           |        | 4792                                   | 7043489 | 0.00068  |           |        |
|             | C     | 15145                            | 24129245 | 0.000628 |           |        | 4255                                   | 6723093 | 0.000633 |           |        |
| 2           | A     | 16885                            | 24940626 | 0.000677 | 0.0007003 | 6.7    | 4761                                   | 6841364 | 0.000696 | 0.0006816 | 8.6    |
|             | B     | 22101                            | 33003079 | 0.00067  |           |        | 5543                                   | 8978393 | 0.000617 |           |        |
|             | C     | 15709                            | 20824742 | 0.000754 |           |        | 4215                                   | 5762551 | 0.000731 |           |        |
| 3           | A     | 14597                            | 23610304 | 0.000618 | 0.0006465 | 9.0    | 4534                                   | 6727459 | 0.000674 | 0.0006647 | 6.5    |
|             | B     | 17428                            | 24427595 | 0.000713 |           |        | 4663                                   | 6634333 | 0.000703 |           |        |
|             | C     | 14689                            | 24163363 | 0.000608 |           |        | 4318                                   | 6993599 | 0.000617 |           |        |
| 4           | A     | 17321                            | 23939689 | 0.000724 | 0.0007323 | 1.8    | 5167                                   | 6848605 | 0.000754 | 0.0007197 | 8.5    |
|             | B     | 14859                            | 19870756 | 0.000748 |           |        | 4020                                   | 5319276 | 0.000756 |           |        |
|             | C     | 14630                            | 20162437 | 0.000726 |           |        | 3651                                   | 5626398 | 0.000649 |           |        |
| 5           | A     | 11144                            | 15673243 | 0.000711 | 0.0007036 | 7.4    | 3231                                   | 4341533 | 0.000744 | 0.0007076 | 6.5    |
|             | B     | 12108                            | 16109669 | 0.000752 |           |        | 2979                                   | 4538781 | 0.000656 |           |        |
|             | C     | 10709                            | 16524513 | 0.000648 |           |        | 3320                                   | 4596572 | 0.000722 |           |        |
| AVERAGE     |       |                                  |          |          | 0.0006813 | 5.2    |                                        |         |          | 0.0006817 | 7.4    |
| CV (%)      |       |                                  |          |          | 6.6       |        |                                        |         |          | 5.0       |        |

**Table S4.** Summary of PRISM-SRM measurements of AGR2 in 5 prostate cancer patient serum specimens. The L/H peak area ratio from the transition of 407.7/604.3 and the corresponding calibration curve from the same transition were used to determine the serum AGR2 protein concentrations because the highest abundance transition of 407.7/351.2 showed matrix interference.

| Sample ID <sup>a</sup> | L/H <sup>b</sup> | CV   | AGR2 concentration (PRISM-SRM, pg/mL) | Total PSA concentration <sup>c</sup> (ELISA, ng/mL) |
|------------------------|------------------|------|---------------------------------------|-----------------------------------------------------|
| 12                     | 0.000224         | 9.3  | 130.9                                 | 67.7                                                |
| 16                     | 0.000223         | 18.9 | 139.9                                 | 68.1                                                |
| 19                     | 0.000429         | 1.4  | 231.7                                 | 89.5                                                |
| 27                     | 0.000172         | 7.7  | 111.7                                 | 74.1                                                |
| 29                     | 0.000875         | 14.7 | 569.4                                 | 110.8                                               |

<sup>a</sup> prostate cancer patient sera.

<sup>b</sup> Average L/H for 2 SRM measurements.

<sup>c</sup> Total PSA concentration previously measured by ELISA assay.

**Table S5.** Summary of ELISA measurements in prostate cancer patient urine specimens.

| Samples ID | Vol before concentration (ml) | Volume after concentration (ml) | Protein concentration in $\mu\text{g}/\mu\text{l}$ after concentration | Volume ( $\mu\text{l}$ /well) used in ELISA | Amount of protein used ( $\mu\text{g}$ /well) for ELISA | OD405 | Estimated amount of AGR2 (pg) detected per well in ELISA | Estimated amount of AGR2 (pg) per 100 $\mu\text{g}$ concentrated urine protein | Estimated amount of AGR2 (pg) per ml urine |
|------------|-------------------------------|---------------------------------|------------------------------------------------------------------------|---------------------------------------------|---------------------------------------------------------|-------|----------------------------------------------------------|--------------------------------------------------------------------------------|--------------------------------------------|
| P06-011    | 50                            | 1.1                             | 1.28                                                                   | 200                                         | 256                                                     | 0.701 | 53.6                                                     | 21                                                                             | 5.9                                        |
| P07-031    | 33                            | 1.2                             | 2.4                                                                    | 200                                         | 480                                                     | 3.356 | 1000                                                     | 208                                                                            | 181                                        |
| P07-047    | 35                            | 1.8                             | 1.3                                                                    | 200                                         | 260                                                     | 0.175 | 6                                                        | 2.3                                                                            | 1.5                                        |
| P07-018    | 35                            | 0.8                             | 2.7                                                                    | 200                                         | 540                                                     | 2.804 | 422                                                      | 78                                                                             | 48                                         |
| P08-015    | 50                            | 0.9                             | 1.5                                                                    | 200                                         | 300                                                     | 1.756 | 187.5                                                    | 62.5                                                                           | 16.9                                       |
| P08-032    | 50                            | 0.9                             | 0.7                                                                    | 200                                         | 140                                                     | 0.28  | 14                                                       | 10                                                                             | 1.26                                       |

**Table S6.** The SRM signal ratio of urinary AGR2/PSA protein from SRM measurements in 37 prostate cancer patient urine specimens (crude internal standards for AGR2 and pure internal standards for PSA were spiked at 10 fmol/ $\mu$ L and 5 fmol/ $\mu$ L, respectively).

| Prostate cancer patient urine ID <sup>a</sup> |             | L/H <sub>AGR2</sub> <sup>b</sup> | L/H <sub>PSA</sub> <sup>c</sup> | (L/H <sub>AGR2</sub> )/(L/H <sub>PSA</sub> ) |
|-----------------------------------------------|-------------|----------------------------------|---------------------------------|----------------------------------------------|
| Non-cancer                                    | P07022BN    | 0.001716                         | 1.243                           | 0.00138                                      |
|                                               | P07036BN    | 0.003751                         | 18.011                          | 0.00021                                      |
|                                               | P08018BN    | 0.000770                         | 0.955                           | 0.00086                                      |
|                                               | P08022BN    | 0.002895                         | 1.007                           | 0.00288                                      |
|                                               | P08036BN    | 0.001974                         | 3.857                           | 0.00051                                      |
|                                               | P09040AN    | 0.007801                         | 0.590                           | 0.01323                                      |
|                                               | SAP12_003BN | 0.00410                          | 1.236                           | 0.003316                                     |
|                                               | SAP12_008BN | 0.00735                          | 1.009                           | 0.007281                                     |
|                                               | SAP12_014BN | 0.00320                          | 0.779                           | 0.004106                                     |
|                                               | SAP12_016BN | 0.00435                          | 0.812                           | 0.005357                                     |
|                                               | SAP12_017BN | 0.00610                          | 1.112                           | 0.005488                                     |
|                                               | SAP12_026BN | 0.02220                          | 1.763                           | 0.012593                                     |
|                                               | SAP12_028BN | 0.00570                          | 3.507                           | 0.001625                                     |
|                                               | SAP12_030BN | 0.00295                          | 1.095                           | 0.002693                                     |
|                                               | SAP12_033BN | 0.00315                          | 0.280                           | 0.011259                                     |
|                                               | SAP12_034BN | 0.00500                          | 1.237                           | 0.004043                                     |
|                                               | SAP12_035BN | 0.01040                          | 2.125                           | 0.004894                                     |
|                                               | SAP12_039BN | 0.01230                          | 1.397                           | 0.008803                                     |
|                                               | SAP12_050BN | 0.01790                          | 28.825                          | 0.000621                                     |
|                                               | SAP12_052BN | 0.00690                          | 2.129                           | 0.003241                                     |
|                                               | SAP12_071BN | 0.00790                          | 2.277                           | 0.003469                                     |
|                                               | SAP12_072BN | 0.00315                          | 3.857                           | 0.000817                                     |
|                                               | SAP12_077BN | 0.00630                          | 1.471                           | 0.004284                                     |
| Cancer                                        | P06003Pre   | 0.000373                         | 0.249                           | 0.00149                                      |
|                                               | P06011Pre   | 0.003331                         | 0.330                           | 0.01009                                      |
|                                               | P06017Pre   | 0.003392                         | 0.169                           | 0.02006                                      |
|                                               | P07016Pre   | 0.005759                         | 0.002                           | 3.41433                                      |
|                                               | P07018Pre   | 0.012275                         | 0.893                           | 0.01495                                      |
|                                               | P07019Pre   | 0.000858                         | 0.003                           | 0.28319                                      |
|                                               | P07029Pre   | 0.000107                         | 0.046                           | 0.00232                                      |
|                                               | P07031Pre   | 0.026813                         | 0.196                           | 0.13680                                      |
|                                               | P07040Pre   | 0.003952                         | 0.261                           | 0.01403                                      |
|                                               | P07047Pre   | 0.000734                         | 0.145                           | 0.00481                                      |
|                                               | P08006rPre  | 0.001333                         | 3.393                           | 0.00044                                      |
|                                               | P08015Pre   | 0.002327                         | 3.240                           | 0.00065                                      |
|                                               | P08028Pre   | 0.002061                         | 0.087                           | 0.02370                                      |
|                                               | P08032Pre   | 0.000863                         | 0.681                           | 0.00139                                      |

<sup>a</sup> Clinical prostate cancer patient urine samples.

<sup>b</sup> Average L/H for 3 SRM measurements. L/H peak area ratio from LPQTL SR was used.

<sup>c</sup> Average L/H for 2 SRM measurements. L/H peak area ratio from IVGGWEC<sub>cam</sub> EK was used.

## Supplemental Methods

To accurately determine AGR2 concentration from PRISM-SRM measurements, the digestion efficiency and protein recovery in the SPE cleanup were presumably the same between native AGR2 protein in human serum or urine and standard AGR2 protein for generating calibration curves.

### 1. Measured urinary AGR2 protein concentration calculation

Based on the L/H ratio of measured AGR2 protein in prostate cancer patient urine, the AGR2 protein concentrations were determined by using standard AGR2 protein calibration curves. Considering the large variation of urinary protein concentration, the original AGR2 protein concentrations in prostate cancer patient urine were then expressed as pg/100 total urine proteins.

$C_{\text{urinary AGR2 protein concentration (pg/100 } \mu\text{g total urinary protein)}} = C_{\text{AGR2 protein concentration determined by calibration curve (pg/}\mu\text{L)}} \times V(\mu\text{L/100 } \mu\text{g urinary proteins)}$

$V(\mu\text{L/100 } \mu\text{g urinary proteins}) = 100 \mu\text{g}/(0.5 \mu\text{g/}\mu\text{L}) \text{ per } 100 \mu\text{g urinary protein} = 200 (\mu\text{L/100 } \mu\text{g urinary protein})$

Thus,  $C_{\text{urinary AGR2 protein concentration (pg/100 } \mu\text{g total urinary protein)}} = C_{\text{AGR2 protein concentration determined by calibration curve (pg/}\mu\text{L)}} \times 200 (\mu\text{L/100 } \mu\text{g urinary protein})$

## 2. Measured serum AGR2 protein concentration calculation

To accurately determine the serum AGR2 concentration from PRISM-SRM measurements, the digestion efficiency and protein recovery in the SPE cleanup were presumably the same between native AGR2 protein in human serum and standard AGR2 protein for generating calibration curves. Based on the L/H ratio of measured AGR2 protein in prostate cancer patient sera, the AGR2 protein concentrations at the digested peptide level were determined by using standard AGR2 protein calibration curves. The original AGR2 protein concentrations in prostate cancer patient sera were the AGR2 protein concentrations at the digested peptide level times the dilution factor assuming AGR2 protein recovery was 100% during IgY14 immunoaffinity depletion.

$$C_{\text{original AGR2 protein concentration}} = C_{\text{AGR2 protein concentration at peptide level}} \times \text{dilution factor}$$

$$\text{Dilution factor} = V_{\text{peptide mixture concentration at } 0.5\mu\text{g}/\mu\text{L}} / V_{\text{original serum}}$$

$V_{\text{original serum}}$ : total volume of starting human serum for IgY14 depletion.

$V_{\text{peptide mixture concentration at } 0.5\mu\text{g}/\mu\text{L}}$ : total volume of peptide mixtures (from digestion of the IgY14 flow-through) at a concentration of 0.5  $\mu\text{g}/\mu\text{L}$  for PRISM fractionation.

## 3. Coefficient of variation (CV) calculation

Precision was determined by CV (standard deviation divided by the mean) and expressed as a percentage. For each patient sample, standard deviation and CV calculation were based on three injection replicates of LC-SRM measurements. For the five sample aliquots the PRISM-SRM processing precision was evaluated systematically: five processing replicates involving trypsin digestion, SPE cleanup, and PRISM-SRM measurements. The mean value of the five processing

replicates was obtained from five average L/H area ratio values, and each average L/H value was based on three technical replicates per processing replicate.
