# Supplementary material
Source: PubMed Central journal article supplement (PMC3975687)

Figure 1

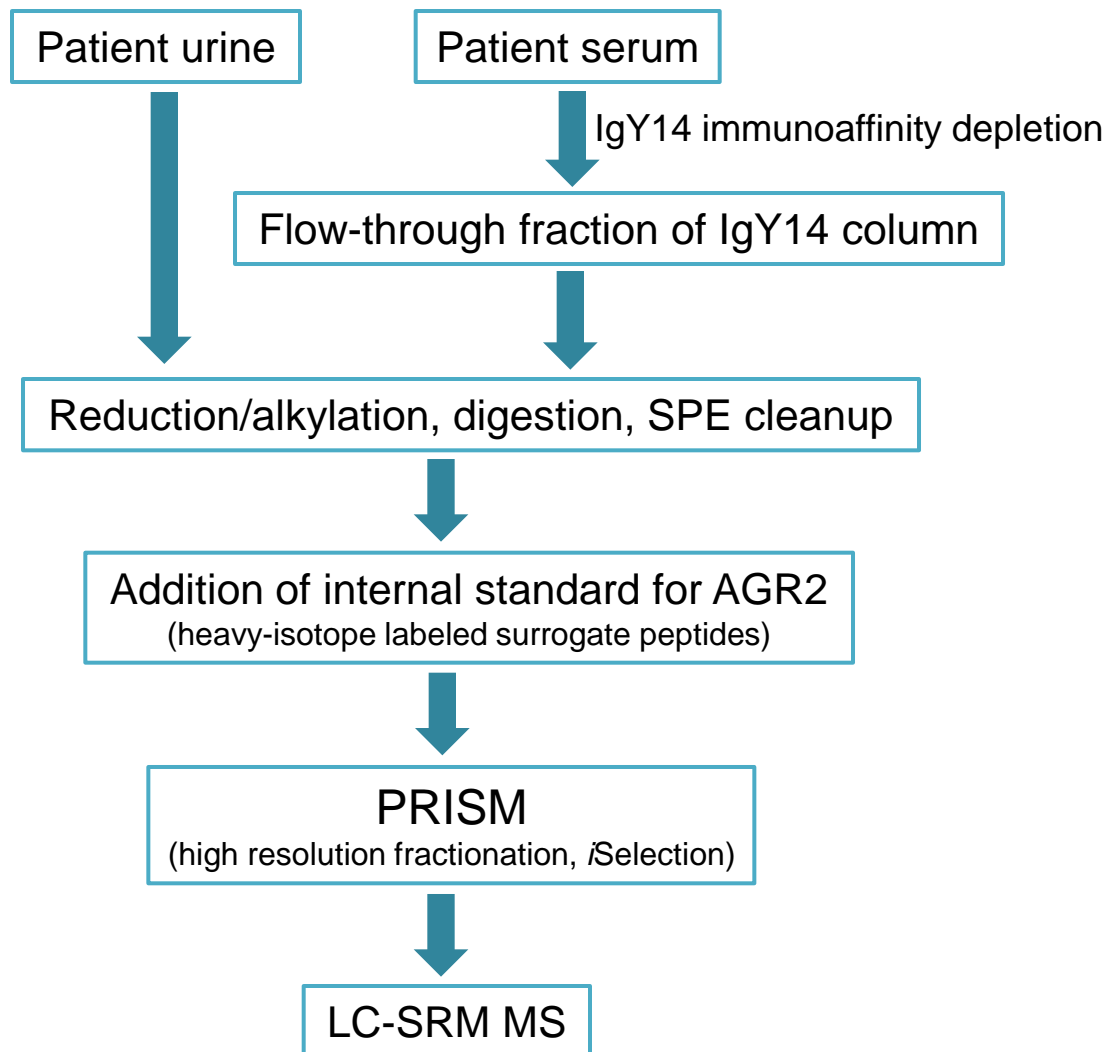

Figure 2

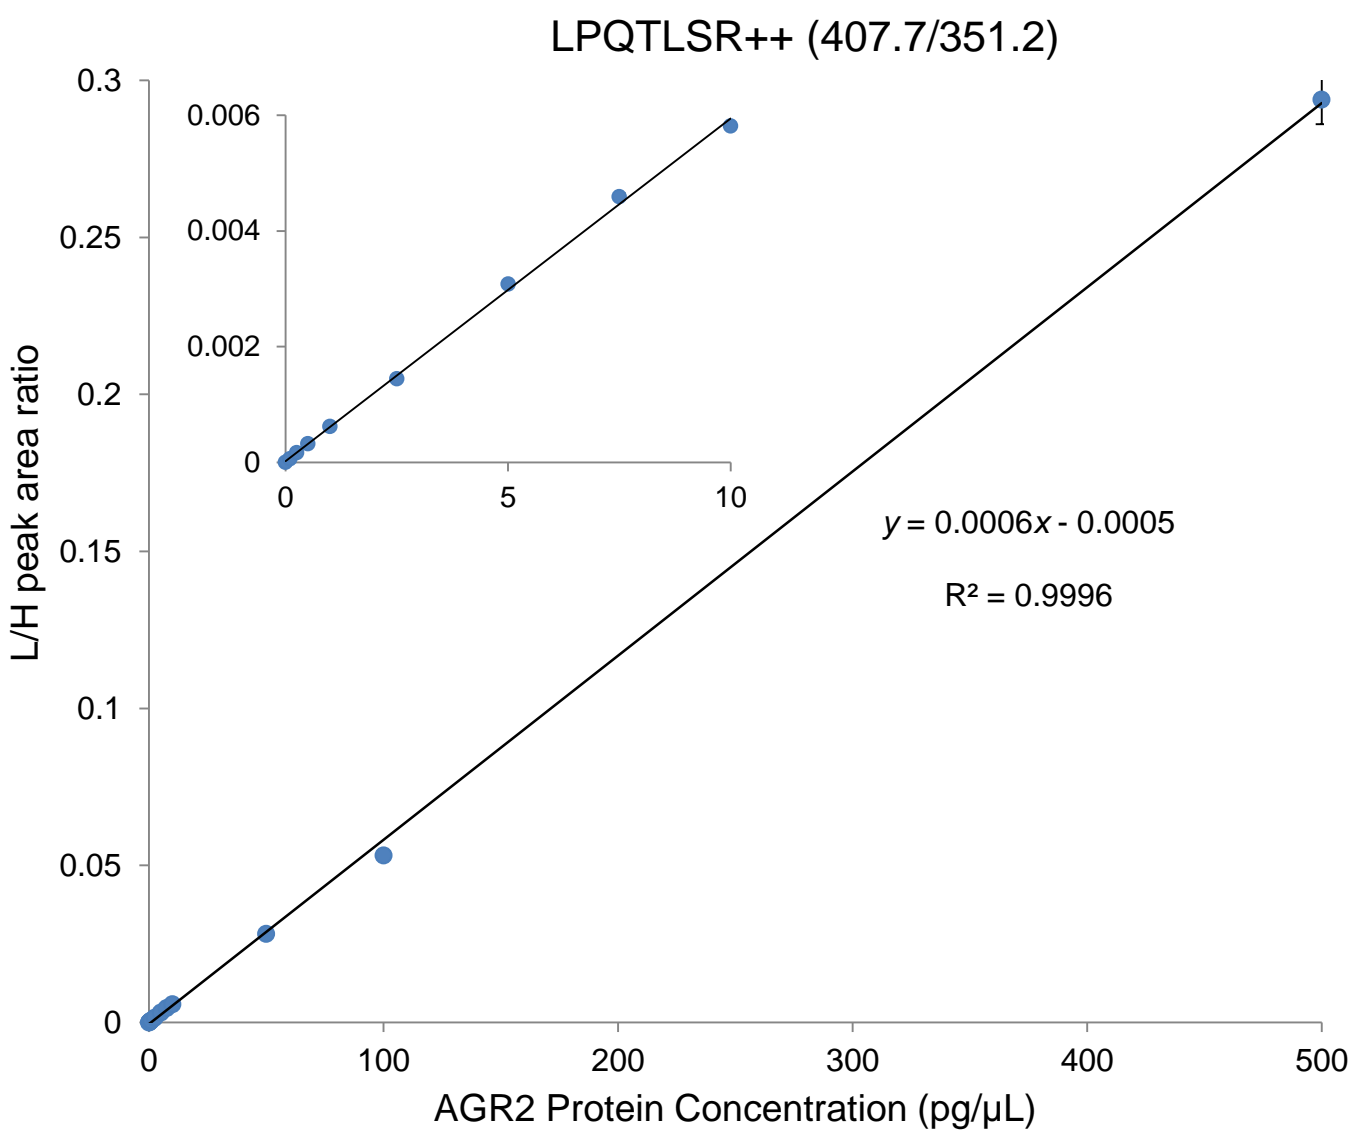

Figure 3

A

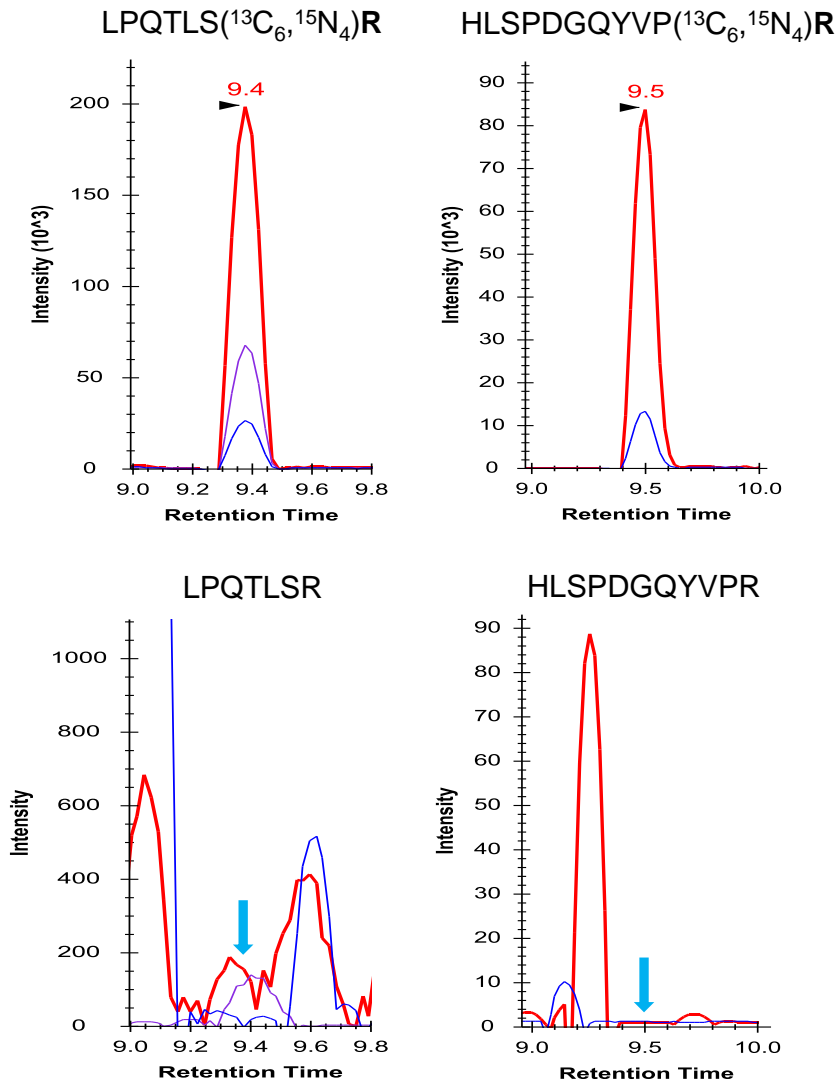

B

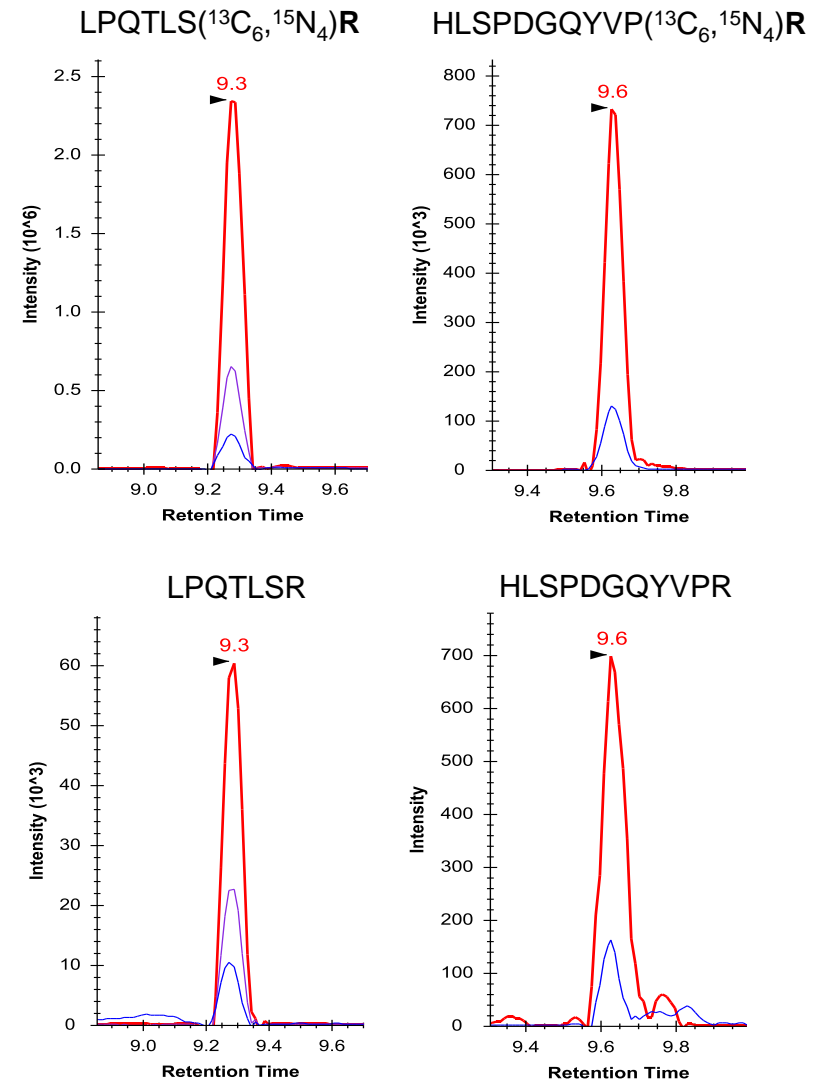

Figure 4

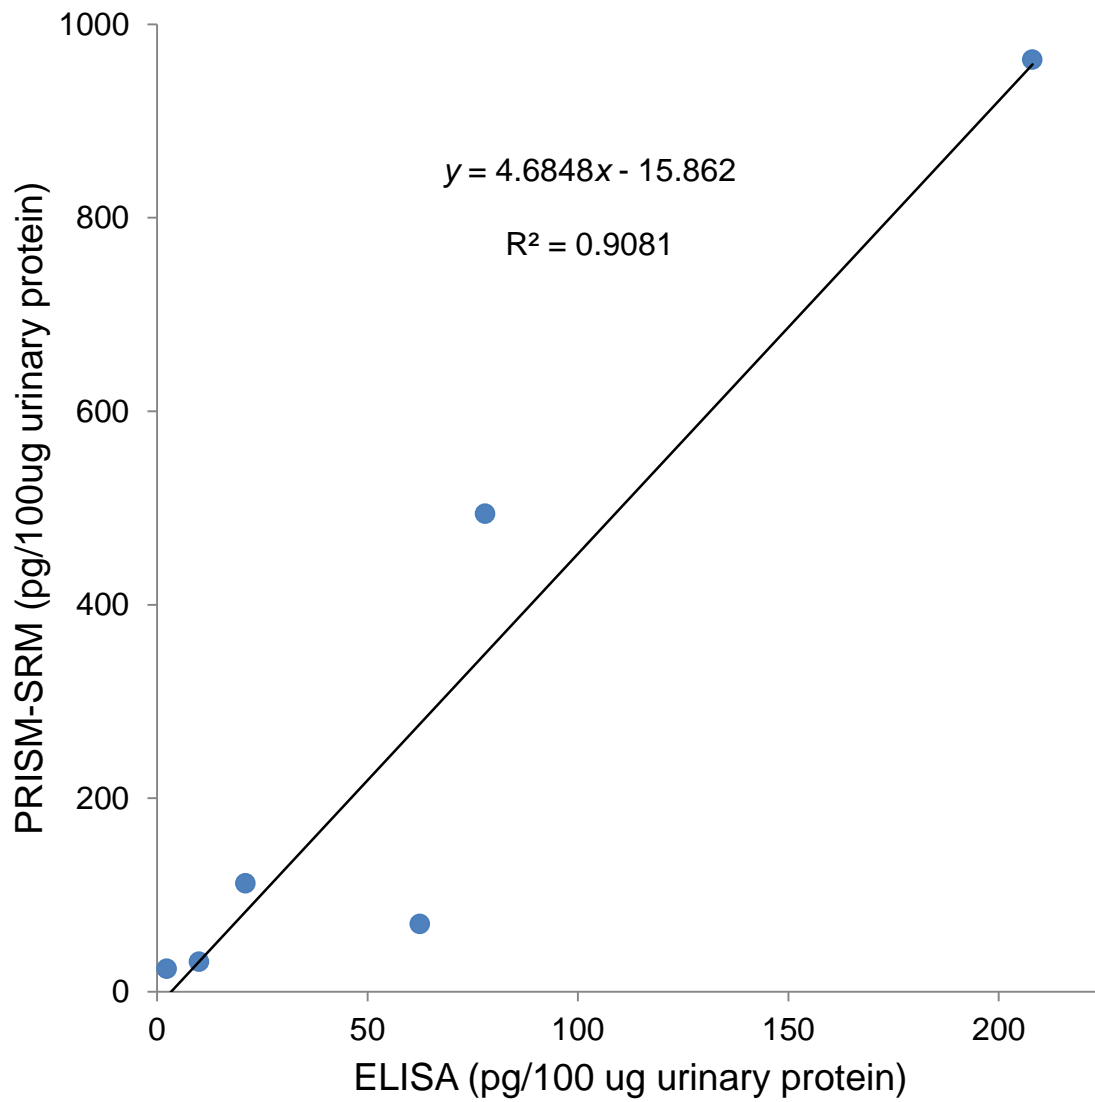

Figure 5

A

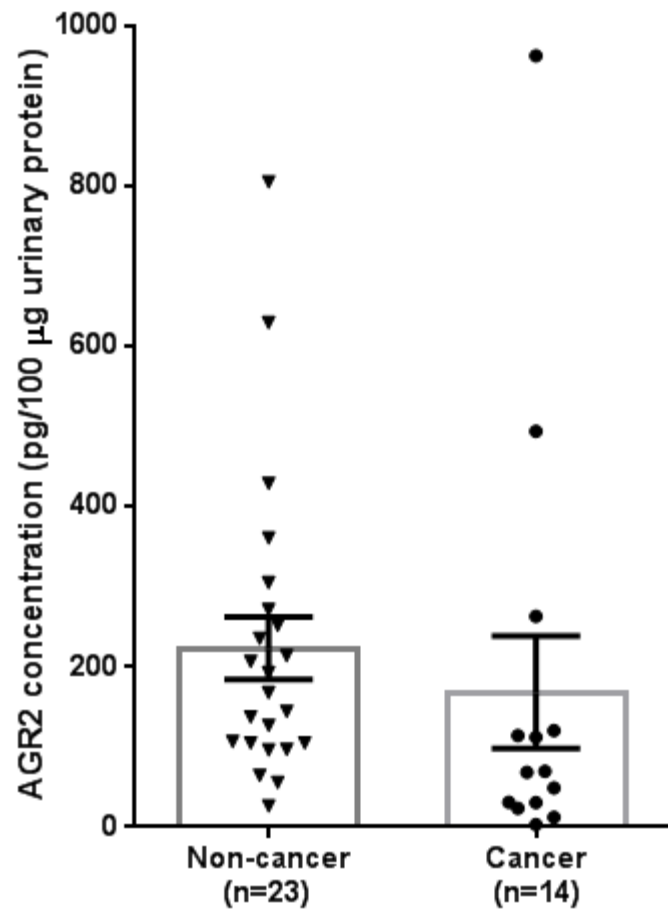

B

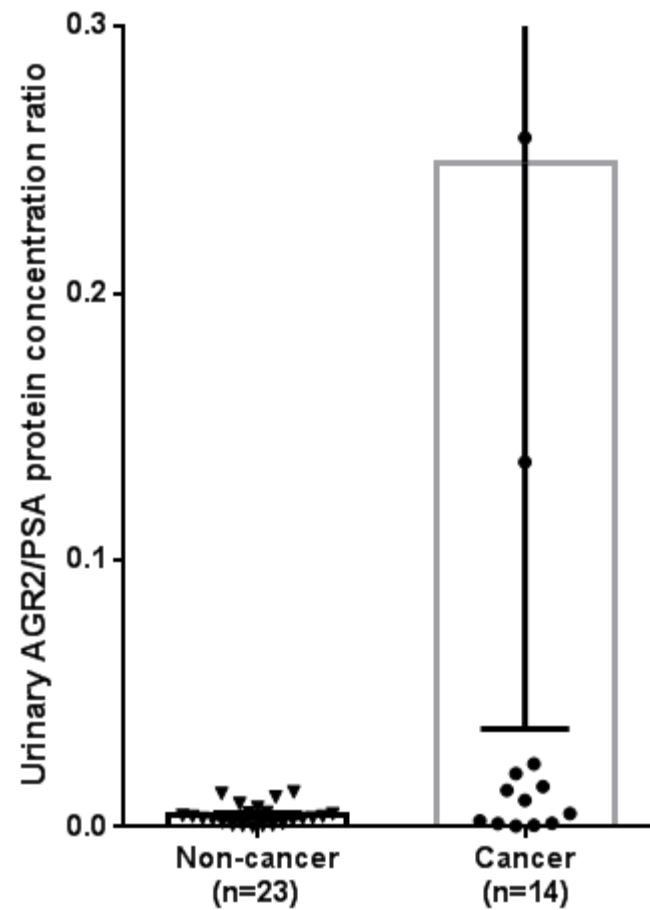

# Table of Content Graphics

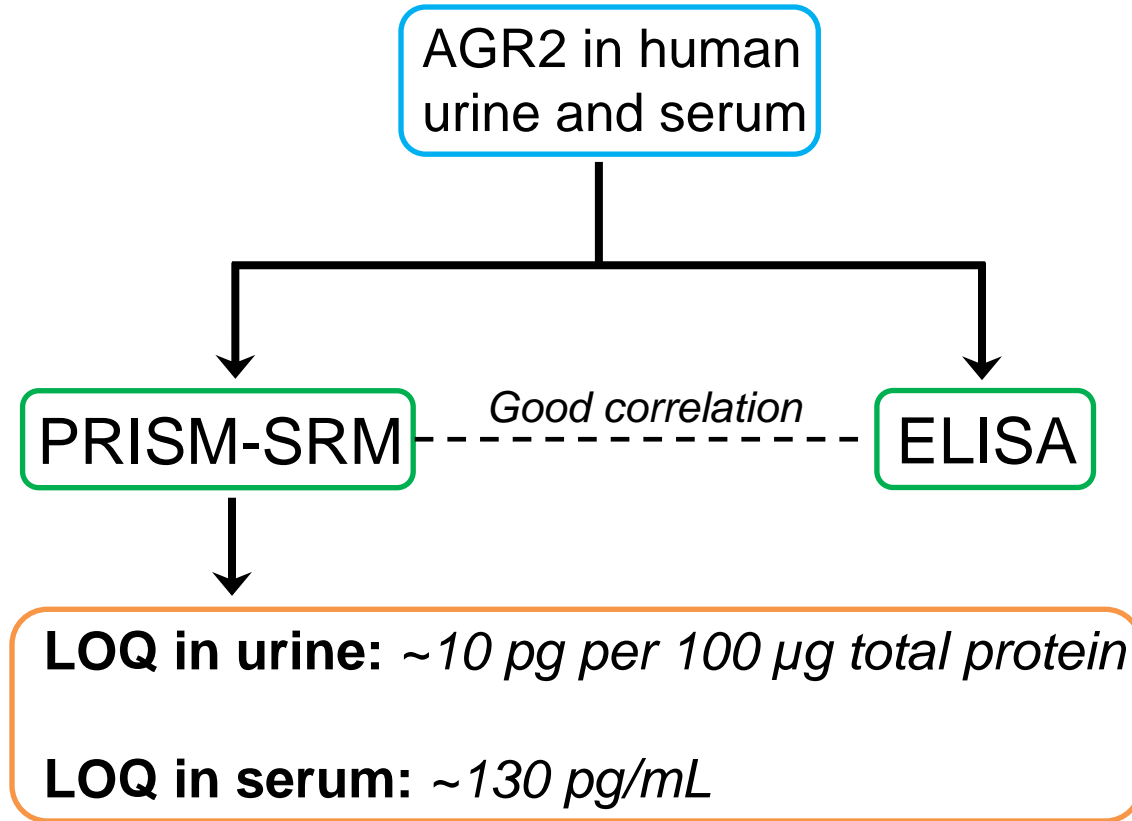

Supplement: NIHMS546183-supplement-1_si_002.pdf [file NIHMS546183-supplement-1_si_002.pdf]
